# Supplementary material
Source: PubMed Central journal article supplement (PMC4789863)
Supplement: huem000429.ww2_default.pdf [file huem000429.ww2_default.pdf]

**Supplementary Table A.** Quality assessments\* on prospective cohort studies on rice consumption in relation to diabetes risk.

| Reference               | 1. Are the comparison groups from the same source population? | 2. Is loss to follow-up rate <20%? | 3. Are rice consumption levels measured by using FFQs? | 4. Is there a validation study for assessing the validity of rice intake measurements by FFQs? | 5. Are diet records used as the reference method in the validation study? | 6. Is correlation coefficient $\geq 0.5$ between the FFQ and the reference method in the validation study? | 7. Are rice consumption assessments updated during follow-up? | 8. Are self-reported diabetes cases confirmed by medical records, physicians, or validated questionnaires? |
|-------------------------|---------------------------------------------------------------|------------------------------------|--------------------------------------------------------|------------------------------------------------------------------------------------------------|---------------------------------------------------------------------------|------------------------------------------------------------------------------------------------------------|---------------------------------------------------------------|------------------------------------------------------------------------------------------------------------|
| Hodge et al. 2004       | 1                                                             | 1                                  | 1                                                      | 0                                                                                              | 0                                                                         | 0                                                                                                          | 0                                                             | 1                                                                                                          |
| Villegas et al. 2007    | 1                                                             | 1                                  | 1                                                      | 1                                                                                              | 0                                                                         | 1                                                                                                          | 1                                                             | 0                                                                                                          |
| Sun et al. 2010         | 1                                                             | 1                                  | 1                                                      | 1                                                                                              | 1                                                                         | 1                                                                                                          | 1                                                             | 1                                                                                                          |
| Sun et al. 2010         | 1                                                             | 1                                  | 1                                                      | 1                                                                                              | 1                                                                         | 1                                                                                                          | 1                                                             | 1                                                                                                          |
| Sun et al. 2010         | 1                                                             | 1                                  | 1                                                      | 1                                                                                              | 1                                                                         | 1                                                                                                          | 1                                                             | 1                                                                                                          |
| Nanri et al. 2010       | 1                                                             | 1                                  | 1                                                      | 1                                                                                              | 1                                                                         | 1                                                                                                          | 0                                                             | 1                                                                                                          |
| Nanri et al. 2010       | 1                                                             | 1                                  | 1                                                      | 1                                                                                              | 1                                                                         | 1                                                                                                          | 0                                                             | 1                                                                                                          |
| % Studies scoring "Yes" | 100.0%                                                        | 100.0%                             | 100.0%                                                 | 85.7%                                                                                          | 71.4%                                                                     | 85.7%                                                                                                      | 57.1%                                                         | 85.7%                                                                                                      |

\*1 = "Yes", 0 = "No", "Unable to determine", or "Not applicable".

**Supplementary Table A.** Quality assessments\* on prospective cohort studies on rice consumption in relation to diabetes risk (cont).

| Reference               | 9. Are prevalent diabetes cases excluded at baseline? | 10. Is an accurate date of diagnosis available for diabetes cases? | 11. Is the total follow-up duration $\geq 5$ years? | 12. Is Cox regression used to model associations between rice consumption and diabetes risk? | 13. Are age, sex, body mass index, and lifestyle practices controlled for in the statistical analysis? | 14. Are dietary factors (other than rice) controlled for in the statistical analysis? | 15. Are gender-specific results available? | Overall quality score |
|-------------------------|-------------------------------------------------------|--------------------------------------------------------------------|-----------------------------------------------------|----------------------------------------------------------------------------------------------|--------------------------------------------------------------------------------------------------------|---------------------------------------------------------------------------------------|--------------------------------------------|-----------------------|
| Hodge et al. 2004       | 1                                                     | 1                                                                  | 0                                                   | 0                                                                                            | 1                                                                                                      | 0                                                                                     | 0                                          | 7                     |
| Villegas et al. 2007    | 1                                                     | 1                                                                  | 1                                                   | 1                                                                                            | 1                                                                                                      | 0                                                                                     | 1                                          | 12                    |
| Sun et al. 2010         | 1                                                     | 1                                                                  | 1                                                   | 1                                                                                            | 1                                                                                                      | 1                                                                                     | 1                                          | 15                    |
| Sun et al. 2010         | 1                                                     | 1                                                                  | 1                                                   | 1                                                                                            | 1                                                                                                      | 1                                                                                     | 1                                          | 15                    |
| Sun et al. 2010         | 1                                                     | 1                                                                  | 1                                                   | 1                                                                                            | 1                                                                                                      | 1                                                                                     | 1                                          | 15                    |
| Nanri et al. 2010       | 1                                                     | 0                                                                  | 1                                                   | 0                                                                                            | 1                                                                                                      | 1                                                                                     | 1                                          | 12                    |
| Nanri et al. 2010       | 1                                                     | 0                                                                  | 1                                                   | 0                                                                                            | 1                                                                                                      | 1                                                                                     | 1                                          | 12                    |
| % Studies scoring "Yes" | 100.0%                                                | 71.4%                                                              | 85.7%                                               | 57.1%                                                                                        | 100.0%                                                                                                 | 71.4%                                                                                 | 85.7%                                      |                       |

\*1 = "Yes", 0 = "No", "Unable to determine", or "Not applicable"
